# Supplementary material for: SnS2 Nanosheets with RGO Modification as High-Performance Anode Materials for Na-Ion and K-Ion Batteries
Source: Nanomaterials (Basel). 2021 Jul 27;11(8):1932. doi: 10.3390/nano11081932 (PMC8401318; doi:10.3390/nano11081932)
Supplement: Supplementary file 1 [file nanomaterials-11-01932-s001.zip › nanomaterials-1322414-supplementary.pdf]

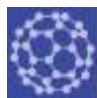

## Supplementary Materials

# SnS<sub>2</sub> Nanosheets with RGO Modification as High-Performance Anode Materials for Na-ion and K-ion Batteries

Leqiang Wu, Hengjia Shao, Chen Yang, Xiangmin Feng, Linxuan Han, Yanli Zhou, Wei Du, Xueqin Sun, Zhijun Xu, Xiaoyu Zhang, Fuyi Jiang \* and Caifu Dong \*

School of Environmental and Material Engineering, Yantai University, Yantai 264005, China; wlq\_246@163.com (L.W.); shao0331@163.com (H.S.); yc083625@163.com (C.Y.); fxm18763285297@163.com (X.F.); a13156280283@163.com (L.H.); zhouyanli@ytu.edu.cn (Y.Z.); duwei@ytu.edu.cn (W.D.); sxq@ytu.edu.cn (X.S.); xuzhijun@ytu.edu.cn (Z.X.); zhangxiaoyu@ytu.edu.cn (X.Z.)

\* Correspondence: fyjiang@ytu.edu.cn (F.J.); dongcf@ytu.edu.cn (C.D.)

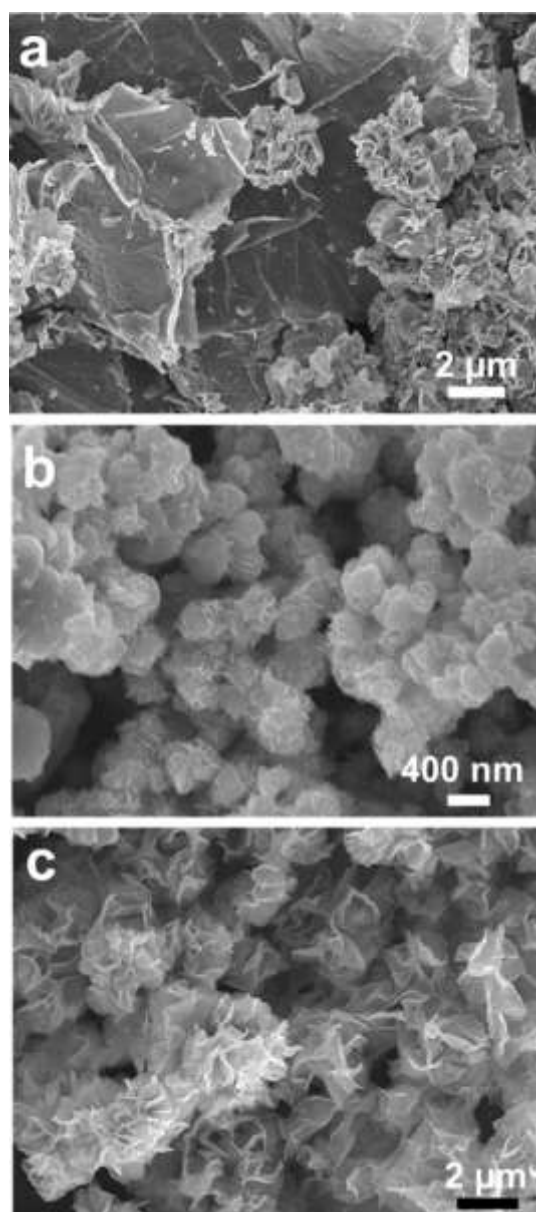

**Figure S1.** FESEM images of the precursors obtained under different reaction conditions. (a) In the presence of GO but without 2-MIN. (b) In the presence of 2-MIN but without GO. (c) In the absence of 2-MIN and GO.

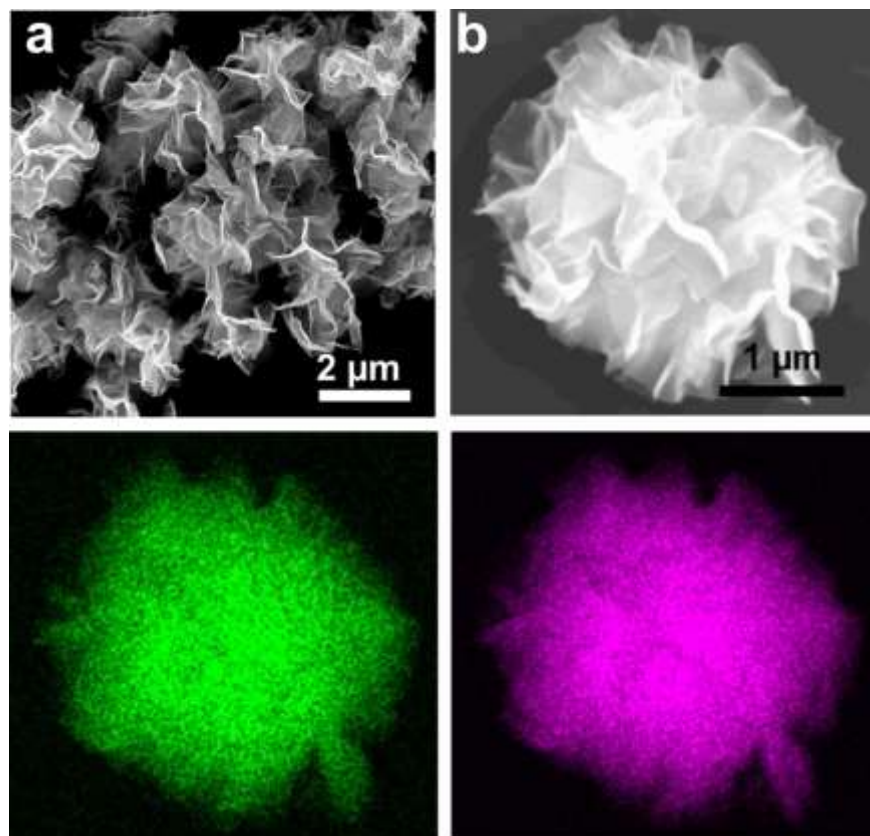

**Figure S2.** (a) FESEM image of SnS<sub>2</sub>. (b) FESEM image of SnS<sub>2</sub> and the corresponding elemental mappings of Sn and S elements (as labeled).

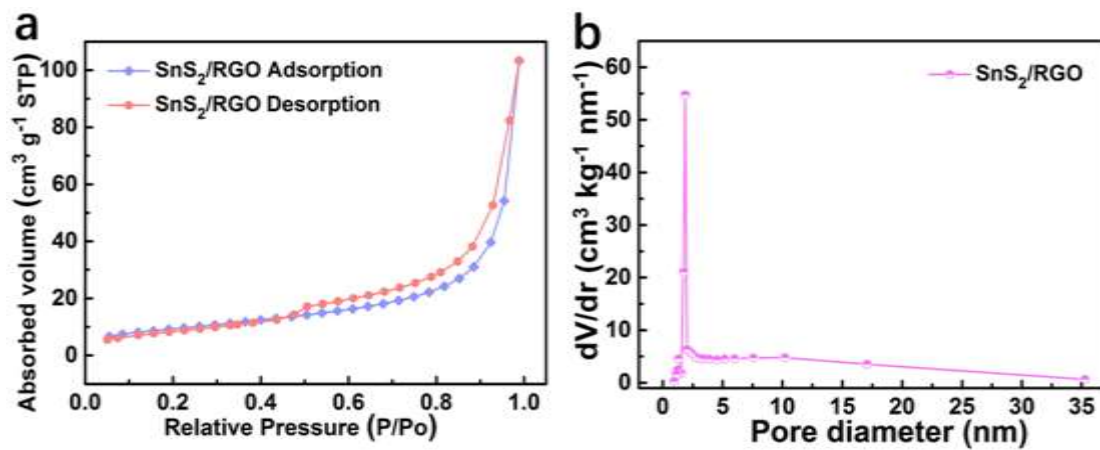

**Figure S3.** (a) Nitrogen adsorption-desorption curve of SnS<sub>2</sub>/RGO, (b) the related pore size distribution curve.

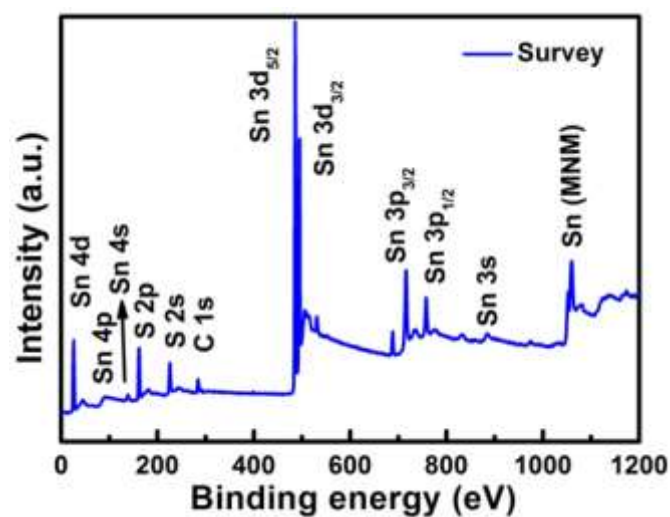

**Figure S4.** High resolution XPS spectrum of SnS<sub>2</sub>.

**Table S1.** Electrochemical performance comparisons of SnS<sub>2</sub>/RGO electrode with those of the previously reported transition metal dichalcogenides anodes for SIBs.

| Electrode                     | Battery     | Current Density (mA g <sup>-1</sup> ) | Cycle Number | Capacity (mAh g <sup>-1</sup> ) | Ref/year        |
|-------------------------------|-------------|---------------------------------------|--------------|---------------------------------|-----------------|
| SnS <sub>2</sub> Microspheres | SIBs        | 0.5                                   | 100          | 548                             | 1/2020          |
| GNS/SnS <sub>2</sub>          | SIBs        | 100                                   | 200          | 462                             | 2/2020          |
| SnS <sub>2</sub> /3DG         | SIBs        | 100                                   | 50           | 430                             | 3/2020          |
| SnS <sub>2</sub> @GNS         | SIBs        | 500                                   | 100          | 374.8                           | 4/2020          |
| SnS/RGO                       | SIBs        | 100                                   | 200          | 443.4                           | 5/2021          |
| SnS-SnS <sub>2</sub>          | SIBs        | 100                                   | 200          | 290.1                           | 6/2019          |
| SnS <sub>2</sub> -CM          | SIBs        | 200                                   | 200          | 322.4                           | 7/2021          |
| SnS <sub>2</sub> NSA          | SIBs        | 500                                   | 100          | 420                             | 8/2017          |
| 2D MXene/SnS 2                | SIBs        | 100                                   | 200          | 332                             | 9/2018          |
| SSC@SnS 2                     | SIBs        | 100                                   | 100          | 564                             | 10/2018         |
| SnS 2 /S-rGO                  | SIBs        | 100                                   | 83           | 530                             | 11/2017         |
| SnS 2 @N,S-GA                 | SIBs        | 50                                    | 100          | 360                             | 12/2017         |
| SnS-ZnS@C                     | SIBs        | 100                                   | 100          | 585                             | 13/2018         |
| <b>SnS<sub>2</sub>/RGO</b>    | <b>SIBs</b> | 500                                   | 80           | 581                             | <b>Our work</b> |

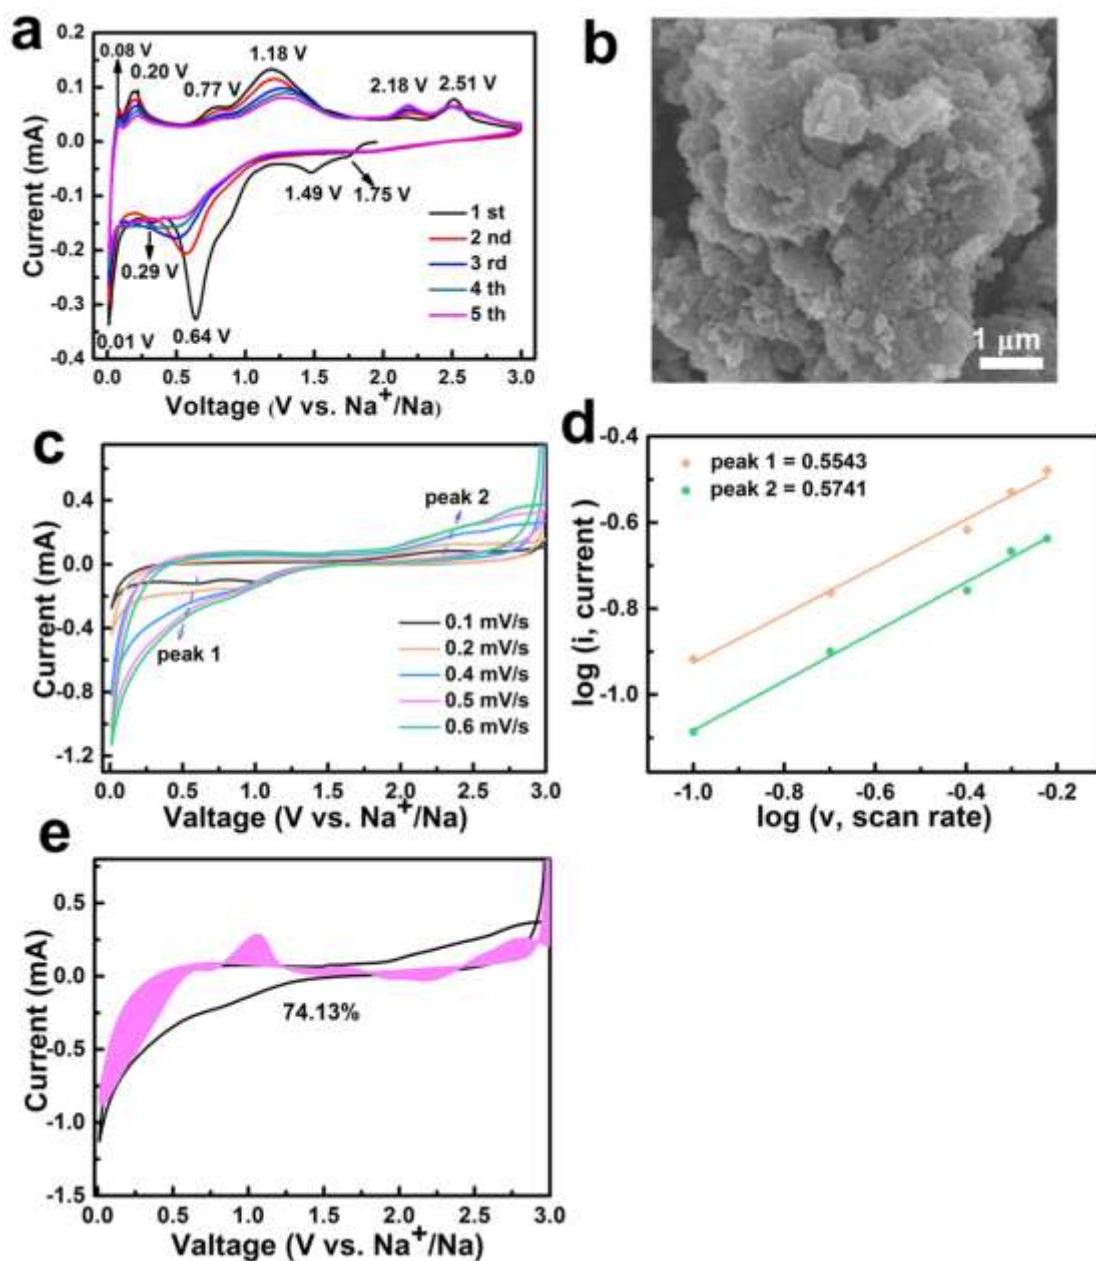

**Figure S5.** (a) Cyclic voltammetry (CV) curves of SnS<sub>2</sub>/RGO. (b) FEEM image of SnS<sub>2</sub>/RGO electrode after rate performance. (c) CV profiles of SnS<sub>2</sub> at different sweep rates. (d) Linear relationship of log (i) vs. log (v) plots at each redox peak. (e) CV curve with capacitive and diffusion-controlled contributions at 0.6 mV s<sup>-1</sup>, in which the pseudocapacitive fraction is shown in the pink region.

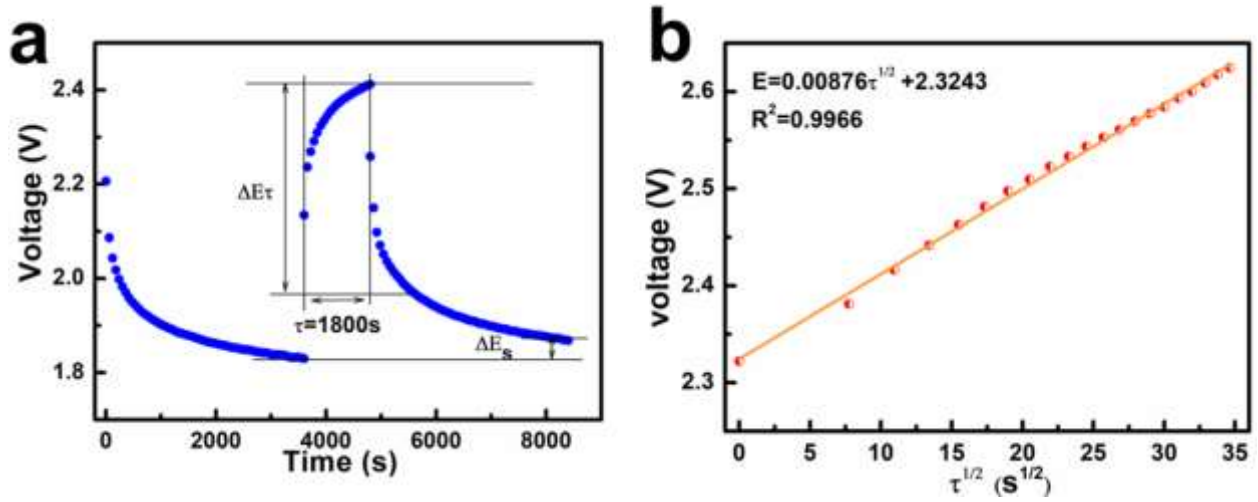

**Figure S6.** (a) Voltage versus time curve for one single GITT test. (b) The plots of voltage *vs.* root of pulse time ( $\tau^{1/2}$ ).

During the GITT test in the first cycle, the cell was charged or discharged at  $0.1 \text{ A g}^{-1}$  for 30 min, then followed by a 90 min open circuit step to allow relaxation back to equilibrium. The procedure was repeated until the discharge (or charge) voltage reached 0.01 V (3 V). Figure S5a shows a single GITT titration curve during the charge process. Where,  $\tau$  is the relaxation time (s);  $\Delta E_s$  stands for the voltage change in two consecutive relaxation period;  $\Delta E_\tau$  represents the voltage change during the constant current pulse, regardless of the IR-drop. Figure S5b presents the plot of voltage *vs.*  $\tau^{1/2}$  is roughly linear, so the  $\text{Na}^+$  diffusion coefficients can be calculated according to the following Equation:

$$D_{\text{Na}} = \frac{4}{\pi\tau} \left( \frac{m_B v_m}{M_B S} \right)^2 \left( \frac{\Delta E_s}{\Delta E_\tau} \right)^2 \quad (1)$$

$D_{\text{Na}}$  ( $\text{cm}^2 \text{ s}^{-1}$ ) is the chemical diffusion coefficient of  $\text{Na}^+$ ;  $m_B$  (g) is the quality of the active material in the electrode;  $M_B$  ( $\text{g mol}^{-1}$ ) is the molecular weight of active material;  $v_m$  ( $\text{cm}^3 \text{ mol}^{-1}$ ) is the molar volume of the active material;  $S$  ( $\text{cm}^2$ ) is the contacting area of electrode with electrolyte (taken as the geometric area of electrode for better comparison with literatures); It shows that the  $D_{\text{Na}}$  values during the insertion and extraction processes are close and on the order of  $10^{-10.5}$  to  $10^{-11.5} \text{ cm}^2 \text{ s}^{-1}$  (Figure 5h, 5i), indicating that  $\text{Na}^+$  has a high kinetic behavior in  $\text{SnS}_2/\text{RGO}$  electrode.<sup>[14,15]</sup> The high  $\text{Na}^+$  diffusion coefficient may be due to the unique micro- and nanostructure, which can be responsible for high rate performance.

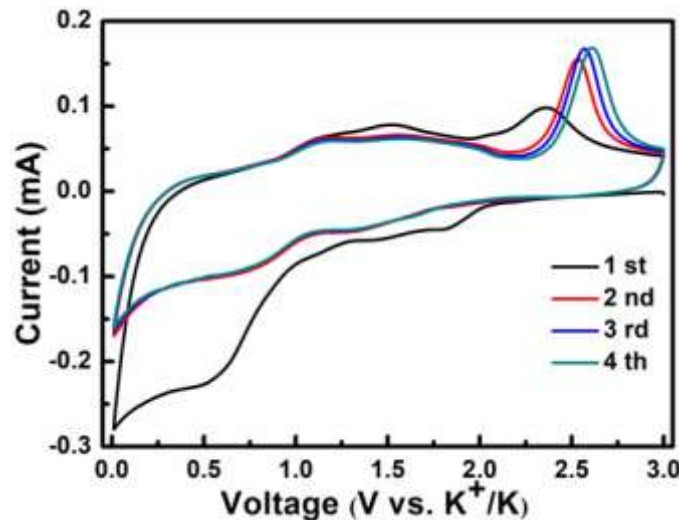

**Figure S7.** CV curves of the  $\text{SnS}_2/\text{RGO}$  electrode at a scan rate of  $0.1 \text{ mV s}^{-1}$  for the first four cycles for PIBs.

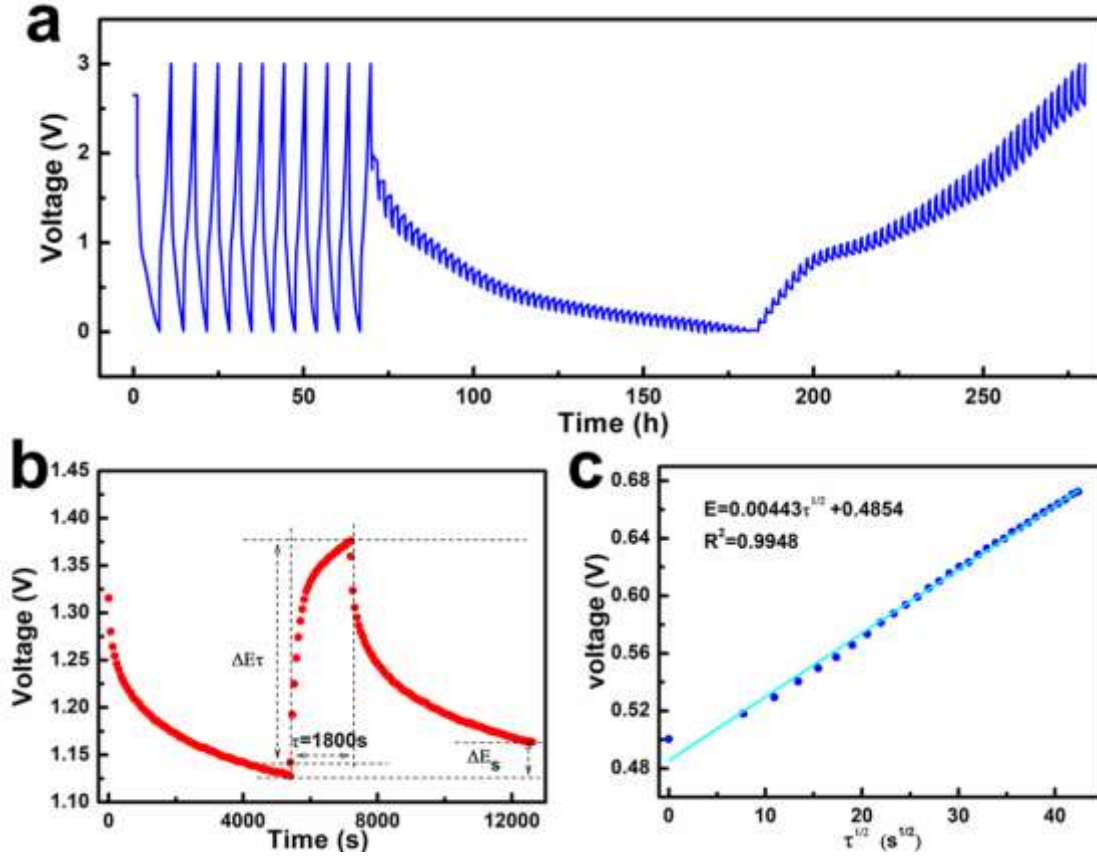

**Figure S8.** (a) The charge/discharge curves of SnS<sub>2</sub>/RGO electrode obtained during GITT measurement, (b) a single GITT titration curve during the charge process, and (c) the plots of voltage vs. root of pulse time ( $\tau^{1/2}$ ).

The GITT test was performed in a voltage range of 0.01–3 V (Figure S7a). Prior to GITT measurement, the assembled cells were charged/discharged at 100 mA g<sup>-1</sup> for 10 cycles to activate the battery. Figure S7b shows a single GITT titration curve during the charge process. Assuming that K<sup>+</sup> transport in the electrode obeys Fick's second law, the chemical diffusion coefficients can be calculated by the following Equation (2):

$$D_K = \frac{4}{\pi} \left( \frac{m_B v_m}{M_B S} \right)^2 \left( \frac{\Delta E_s}{dE_\tau / d\sqrt{\tau}} \right)^2 \quad \left( \tau \ll \frac{L^2}{D_K} \right) \quad (2)$$

When  $dE_\tau / d\sqrt{\tau}$  shows a linear relationship, the equation can be simplified into:

$$D_K = \frac{4}{\pi \tau} \left( \frac{m_B v_m}{M_B S} \right)^2 \left( \frac{\Delta E_s}{\Delta E_\tau} \right)^2$$

Where,  $D_K$  (cm<sup>2</sup> s<sup>-1</sup>) is the chemical diffusion coefficient of K<sup>+</sup>;  $m_B$  (g) is the quantity of the active material in the electrode;  $M_B$  (g mol<sup>-1</sup>) is the molecular weight of active material;  $v_m$  (cm<sup>3</sup> mol<sup>-1</sup>) is the molar volume of the active material;  $S$  (cm<sup>2</sup>) is the contacting area of electrode with electrolyte (taken as the geometric area of electrode for better comparison with literatures);  $\Delta E_s$  is the voltage change in two consecutive relaxation period;  $\Delta E_\tau$  is the voltage change during the constant current pulse. It can be seen that the plots of voltage vs  $\tau^{1/2}$  are roughly linear (Figure S7c), so the K<sup>+</sup> diffusion coefficients at different discharge and charge states can be calculated according to the simplified Eq. 2.

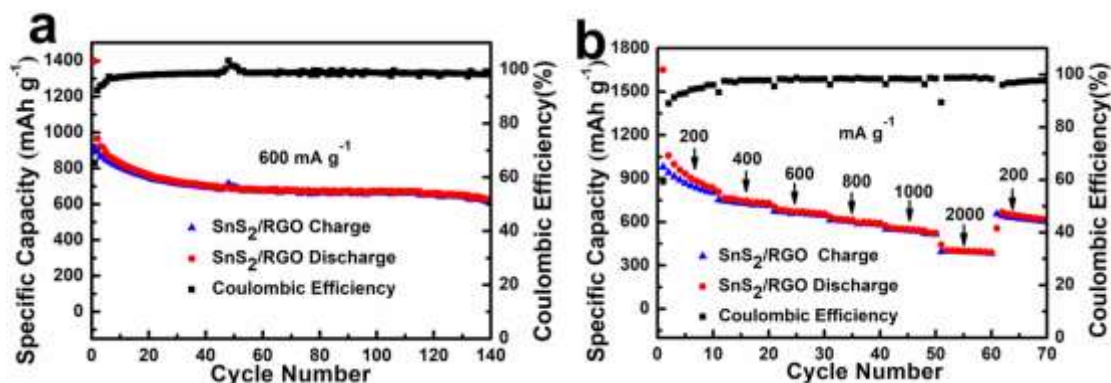

**Figure S9.** (a) The cycling performance of SnS<sub>2</sub>/RGO at 0.6 A g<sup>-1</sup>. (b) Rate performance of SnS<sub>2</sub>/RGO electrode at various densities of 0.2–2.0 A g<sup>-1</sup>.

## References

- Wang, J.; Huang, J.; Huang, S.; Notohara, H.; Urita, K.; Moriguchi, I.; Wei, M. Rational Design of Hierarchical SnS<sub>2</sub> Microspheres with S Vacancy for Enhanced Sodium Storage Performance. *ACS Sustainable Chem. Eng.* **2020**, *8*, 9519–9525.
- Sang, Z.; Yan, X.; Su, D.; Ji, H.; Wang, S.; Dou, S. X.; Liang, J. A Flexible Film with SnS<sub>2</sub> Nanoparticles Chemically Anchored on 3D-Graphene Framework for High Areal Density and High Rate Sodium Storage. *Small* **2020**, *16*, 2001265.
- Zeng, L.; Zhang, L.; Liu, X.; Zhang, C. SnS<sub>2</sub> Nanocrystalline Anchored Three Dimensional Graphene for Sodium Batteries with Improved Rate Performance. *Nanomaterials* **2020**, *10*, 2336.
- Wu, Y. Q.; Yang, Y.; Pu, H.; Gao, R. Z.; Meng, W. J.; Yang, H. X.; Zhao, D. L. SnS<sub>2</sub> Nanoparticle Integrated Graphene Nanosheets as High Performance and Cyclestable Anodes for Lithium and Sodium Storage. *J. Alloy. Compd.* **2020**, *822*, 153686.
- Mao, W.; Ding, Y.; Li, M.; Ma, C.; Gong, H.; Pan, J.; Zhang, S.; Qian, Y.; Bao, K. Synthesis and Electrochemical Characterization of 2D SnS<sub>2</sub>/RGO as Anode Material in Sodiumion Batteries. *J. Alloy. Compd.* **2021**, *855*, 157209.
- Zhang, S. W.; Lv, W.; Qiu, D.; Cao, T.; Zhang, J.; Lin, Q.; Chen, X.; He, Y. B.; Kang, F.; Yang, Q. H. An ion-conducting SnS-SnS<sub>2</sub> Hybrid Coating for Commercial Activated Carbons Enabling Their Use as High Performance Anodes for Sodium Ion Batteries. *J. Mater Chem A* **2019**, *7*, 10761–10768.
- Liu, H.; Wei, C.; Ai, Z.; Li, M.; Xu, M.; Ma, C.; Shi, J. The Positive Effect of 3D Interpenetrating Network Porous Structure by Carbon Membranes on Alleviating the Volume Expansion of SnS<sub>2</sub> Nanosheets for Enhancing Lithium and Sodium Storage. *Colloids and Surfaces A: Physicochemical and Engineering Aspects* **2021**, *610*, 125937.
- Wang, Y.; Zhou, J.; Wu, J.; Chen, F.; Li, P.; Han, N.; Huang, W.; Liu, Y.; Ye, H.; Zhao, F.; Li, Y. Engineering SnS<sub>2</sub> Nanosheet Assemblies for Enhanced Electrochemical Lithium and Sodium Ion Storage. *J. Mater Chem A* **2017**, *5*, 25618–25624.
- Wu, Y.; Nie, P.; Wu, L.; Dou, H.; Zhang, X. 2D MXene/SnS<sub>2</sub> Composites as High Performance Anodes for Sodium Ion Batteries. *Chem. Eng. J.* **2018**, *334*, 932938.
- Yang, Z.; Zhang, P.; Wang, J.; Yan, Y.; Yu, Y.; Wang, Q.; Liu, M. Hierarchical Carbon@SnS<sub>2</sub> Aerogel with "Skeleton/Skin" Architectures as a High Capacity, High Rate Capability and Long Cycle Life Anode for Sodium Ion Storage. *ACS Appl Mater Interfaces* **2018**, *10*, 37434–37444.
- Zheng, P.; Dai, Z.; Zhang, Y.; Dinh, K. N.; Zheng, Y.; Fan, H.; Yang, J.; Dangol, R.; Li, B.; Zong, Y.; Yan, Q.; Liu, X. Scalable Synthesis of SnS<sub>2</sub>/S-doped Graphene Composites for Superior Li/Na Ion Batteries. *Nanoscale* **2017**, *9*, 14820–14825.
- Fan, L.; Li, X.; Song, X.; Hu, N.; Xiong, D.; Koo, A.; Sun, X. Promising Dual Doped Graphene Aerogel/SnS<sub>2</sub> Nanocrystal Building High Performance Sodium Ion Batteries. *ACS Appl. Mater. Interfaces* **2018**, *10*, 2637–2648.
- Zhang, Y.; Wang, P.; Yin, Y.; Zhang, X.; Fan, L.; Zhang, N.; Sun, K. Heterostructured SnS-ZnS@C Hollow Nanoboxes Embedded in Graphene for High Performance Lithium and Sodium Ion Batteries. *Chem. Eng. J.* **2019**, *356*, 1042–1051.
- Xiao, Y. H.; Zhao, X. B.; Wang, X. Z.; Su, D. C.; Bai, S.; Chen, W.; Fang, S. M.; Zhou, L. M.; Cheng, H. M.; Li, F. A Nanosheet Array of Cu<sub>2</sub>Se Intercalation Compound with Expanded Interlayer Space for Sodium Ion Storage. *Adv. Energy Mater.*, **2020**, 2000666.
- Sun, Z. H.; Wu, X. L.; Xu, J. N.; Qu, D. Y.; Zhao, B. L.; Gu, Z. Y.; Li, W. H.; Liang, H. J.; Gao, L. F.; Fan, Y. Y.; Zhou, K.; Han, D. X.; Gan, S. Y. Y.; Zhang, W.; Niu, L. Construction of Bimetallic Selenides Encapsulated in Nitrogen/Sulfur Co-Doped Hollow Carbon Nanospheres for High-Performance Sodium/Potassium-Ion Half/Full Batteries. *Small* **2020**, 1907670.
